# Supplementary material
Source: MDPI journal article supplement (https://www.mdpi.com/2075-163X/12/1/51)
Supplement: s1 [file s1]

**Table S1.** Full chemical composition (in wt%) dataset of zoisite-(Pb) and hancockite crystals shown in Figures 2 and 3.

| Spot analysis  | SiO <sub>2</sub> | Al <sub>2</sub> O <sub>3</sub> | Fe <sub>2</sub> O <sub>3(tot)</sub> | CaO   | MnO <sub>(tot)</sub> | BaO  | PbO   | Na <sub>2</sub> O | Total  |
|----------------|------------------|--------------------------------|-------------------------------------|-------|----------------------|------|-------|-------------------|--------|
| <i>Hnc1</i>    | 30.81            | 20.27                          | 7.87                                | 11.30 | 0.67                 | 0.09 | 28.22 | 0.00              | 98.44  |
| <i>Hnc2</i>    | 30.02            | 20.14                          | 7.78                                | 11.15 | 0.61                 | 0.06 | 30.22 | 0.00              | 99.19  |
| <i>Hnc3</i>    | 30.26            | 20.51                          | 7.80                                | 11.35 | 0.66                 | 0.02 | 28.80 | 0.00              | 98.61  |
| <i>Hnc4</i>    | 30.46            | 20.39                          | 7.79                                | 11.74 | 0.68                 | 0.00 | 27.81 | 0.00              | 98.10  |
| <i>Hnc5</i>    | 32.68            | 21.54                          | 7.72                                | 13.56 | 0.69                 | 0.05 | 22.21 | 0.00              | 97.68  |
| <i>Hnc6</i>    | 31.59            | 21.47                          | 7.92                                | 13.54 | 0.72                 | 0.04 | 23.75 | 0.00              | 98.25  |
| <i>Hnc7</i>    | 31.97            | 21.55                          | 8.02                                | 13.80 | 0.72                 | 0.05 | 22.99 | 0.00              | 98.29  |
| <i>Hnc8</i>    | 31.70            | 21.45                          | 7.96                                | 13.52 | 0.76                 | 0.04 | 23.99 | 0.05              | 98.66  |
| <i>Hnc9</i>    | 32.01            | 21.41                          | 7.70                                | 13.41 | 0.75                 | 0.05 | 24.40 | 0.00              | 98.95  |
| <i>Hnc10</i>   | 30.75            | 20.54                          | 7.84                                | 11.76 | 0.67                 | 0.05 | 28.15 | 0.03              | 99.01  |
| <i>Hnc11</i>   | 30.43            | 20.75                          | 7.49                                | 11.99 | 0.68                 | 0.05 | 28.04 | 0.05              | 98.72  |
| <i>Hnc12</i>   | 31.14            | 20.80                          | 7.80                                | 12.26 | 0.69                 | 0.05 | 24.91 | 0.00              | 96.86  |
| <i>Hnc13</i>   | 31.92            | 20.96                          | 7.51                                | 12.38 | 0.60                 | 0.02 | 26.71 | 0.03              | 99.38  |
| <i>Hnc14</i>   | 30.73            | 20.81                          | 7.49                                | 11.99 | 0.67                 | 0.04 | 26.76 | 0.00              | 97.74  |
| <i>Zo-Pb15</i> | 32.29            | 24.87                          | 2.00                                | 12.01 | 0.61                 | 0.00 | 28.47 | 0.10              | 100.15 |
| <i>Zo-Pb16</i> | 31.42            | 25.19                          | 1.75                                | 11.90 | 0.64                 | 0.00 | 28.93 | 0.10              | 99.75  |
| <i>Zo-Pb17</i> | 31.35            | 25.16                          | 2.12                                | 11.93 | 0.56                 | 0.00 | 28.64 | 0.00              | 99.55  |
| <i>Zo-Pb18</i> | 31.41            | 24.65                          | 2.32                                | 11.46 | 0.59                 | 0.06 | 30.62 | 0.01              | 100.88 |
| <i>Zo-Pb19</i> | 31.57            | 24.73                          | 2.03                                | 10.92 | 0.76                 | 0.02 | 29.45 | 0.05              | 99.32  |
| <i>Zo-Pb20</i> | 30.44            | 24.57                          | 2.33                                | 11.15 | 0.71                 | 0.09 | 28.87 | 0.01              | 97.93  |
| <i>Zo-Pb21</i> | 30.31            | 24.69                          | 2.35                                | 11.35 | 0.80                 | 0.06 | 29.89 | 0.07              | 99.28  |
| <i>Zo-Pb22</i> | 29.93            | 24.76                          | 1.42                                | 10.10 | 0.55                 | 0.03 | 32.66 | 0.02              | 99.31  |
